# Supplementary material for: Validation of a murine proteome-wide phage display library for identification of autoantibody specificities
Source: JCI journal article supplement (doi:10.1172/jci.insight.174976), 2023-11-07
Supplement: sd1 [file 1]

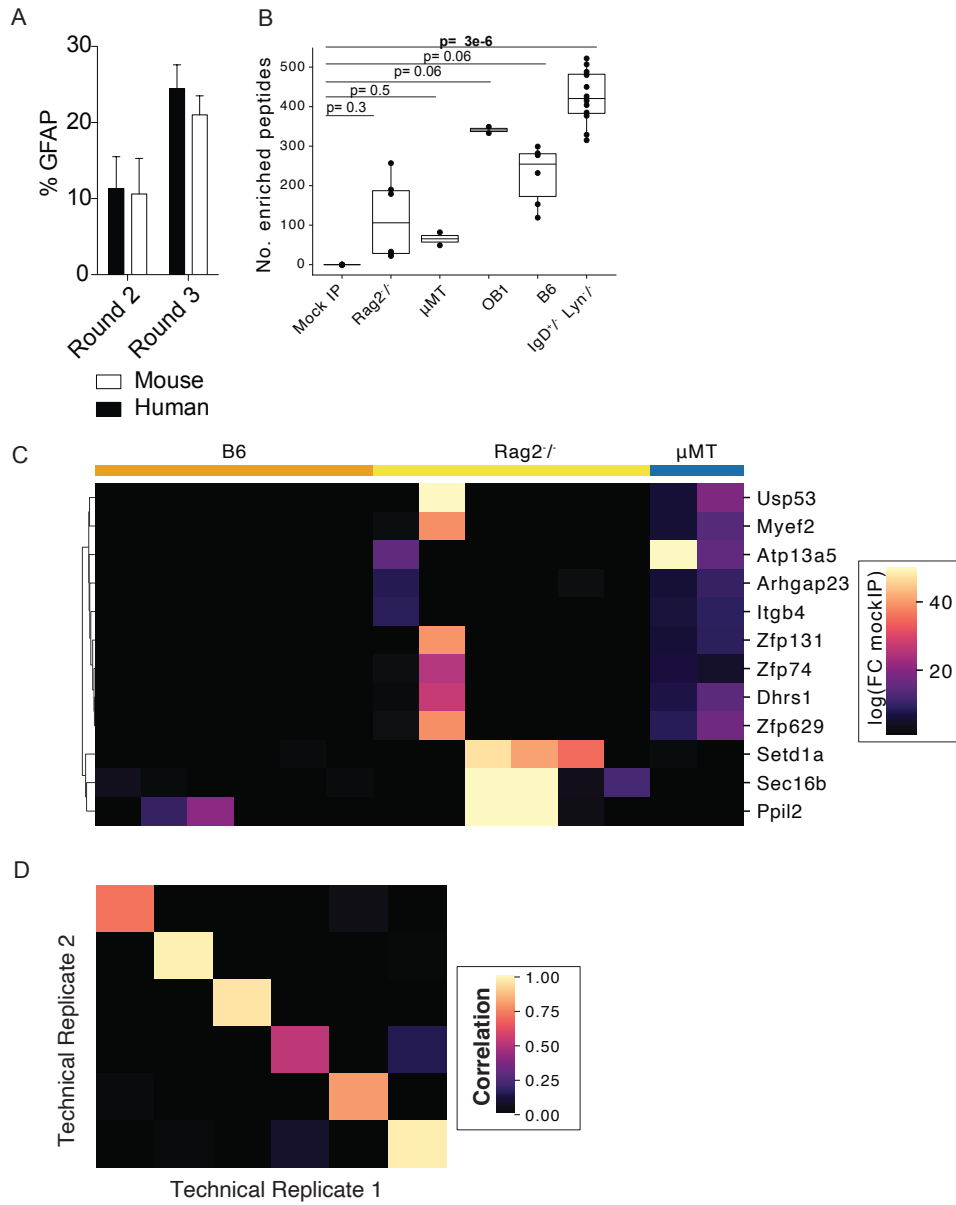

**Supplementary Figure 1. Background modeling with *Rag2*<sup>-/-</sup> and  $\mu$ MT mice. **A.** Percent of reads mapping to human and mouse GFAP positive control peptides after two and three rounds of panning. **B.** Number of enriched peptides identified with a z-score greater than 3 and fold-change greater than 2 compared to mockIP in each experimental sample (mock IP) or mouse strain (*Rag2*<sup>-/-</sup>,  $\mu$ MT, OB1, B6, and *IgD*<sup>+/-</sup> *Lyn*<sup>-/-</sup>). **C.** Heatmap of top peptide log 10 fold change over mock IP in *Rag2*<sup>-/-</sup> or  $\mu$ MT mice compared to B6 mice. Exact p-value is reported, each dot corresponds to a mouse or mockIP replicate; Kruskal Wallis test with Dunn post-hoc. **D.** Heatmap of Pearson correlation of two technically replicated peptide enrichments in *Lyn*<sup>-/-</sup> *IgD*<sup>+/-</sup> mice by PhIP-seq.**

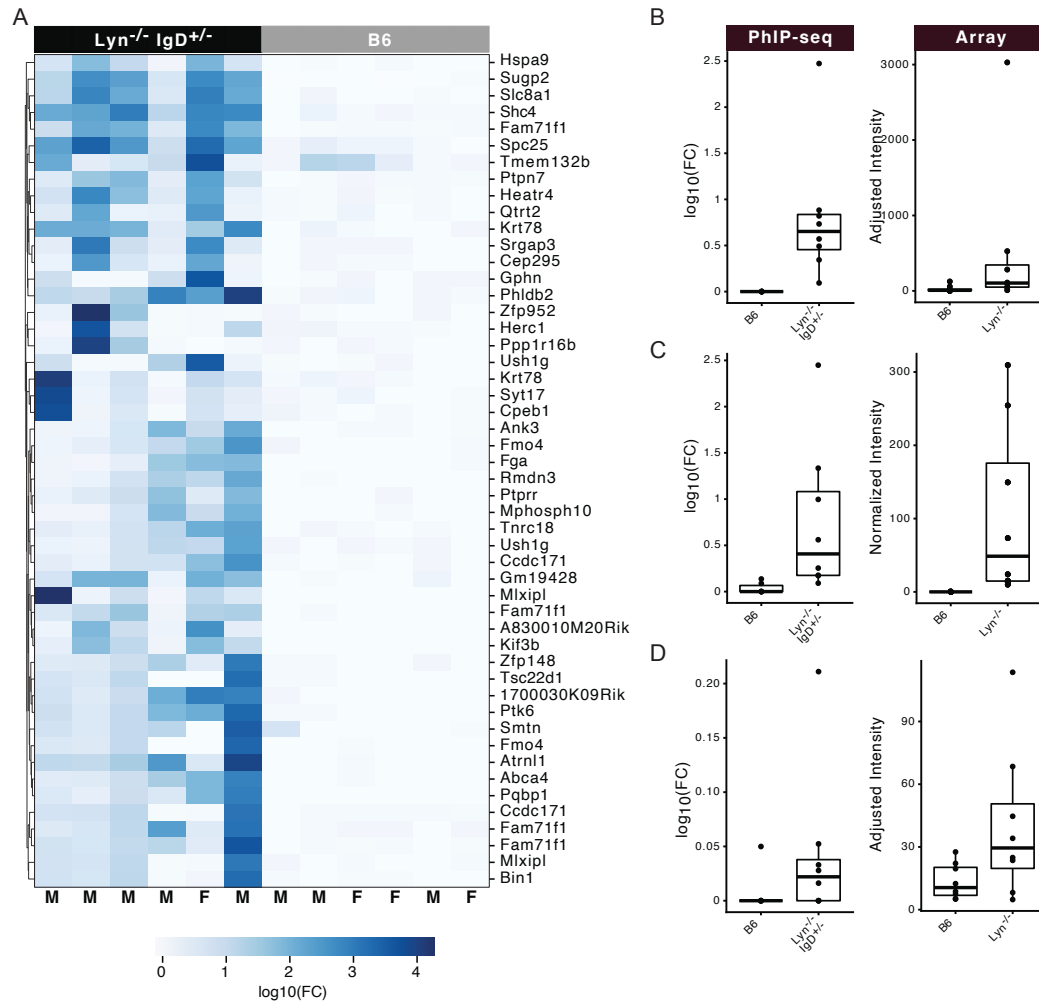

**Supplementary Figure 2. Autoreactive peptides in *Lyn*<sup>-/-</sup> *IgD*<sup>+/-</sup> mice.** Heatmap of log<sub>10</sub> fold change over MBM in **A**. top 50 peptides ranked by fold change in *Lyn*<sup>-/-</sup> *IgD*<sup>+/-</sup> versus B6 mice. Peptide enrichments were identified by PhIP-seq in **A** and annotated by their corresponding protein. Male (M) or female (F) mouse sex indicated on x-axis. Log<sub>10</sub> fold change over MBM or normalized intensity of **B**. Snrp/SmD **C**. Collgen VI, **D**. or Laminin in *Lyn*<sup>-/-</sup> *IgD*<sup>+/-</sup> (left) or *Lyn*<sup>-/-</sup> (right) or wildtype control mice as detected by PhIP-seq (left) or autoantigen array (right).

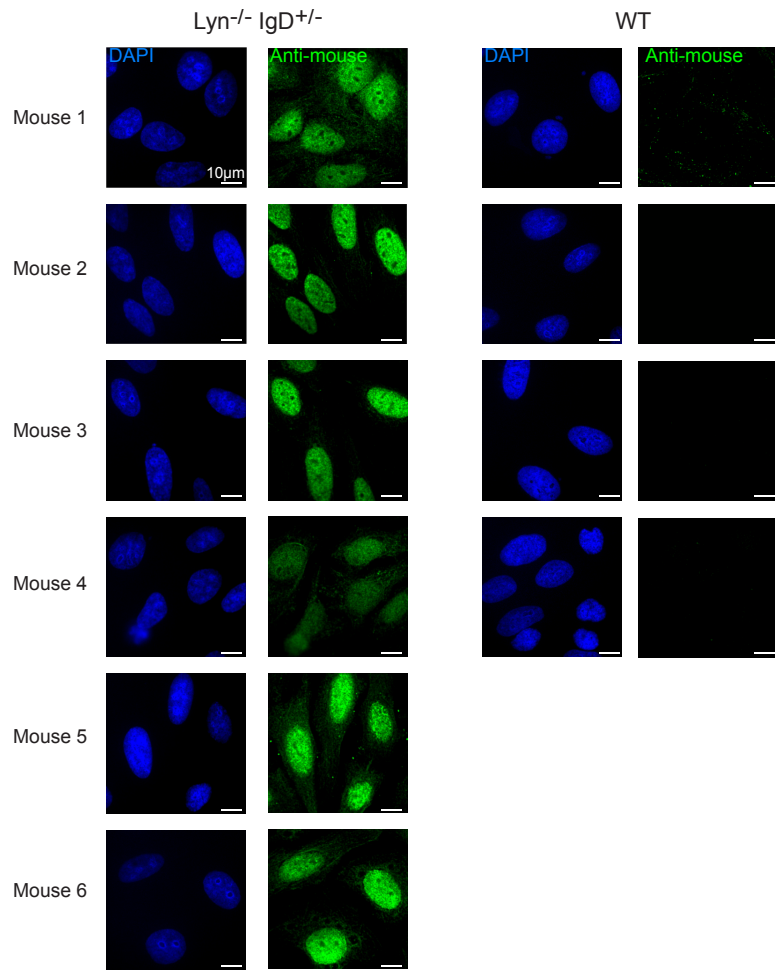

**Supplementary Figure 3. Anti-nuclear antibodies in *Lyn*<sup>-/-</sup> *IgD*<sup>+/-</sup> mice.** Representative images of immunofluorescence detection of *Lyn*<sup>-/-</sup> *IgD*<sup>+/-</sup> (left) or wildtype (right) mouse sera binding to nuclei of HEP-2 cell line. Side-by-side single channel emission for DAPI and anti-mouse Alexa488 is shown for each mouse. Scale bar corresponds to 10 μm.



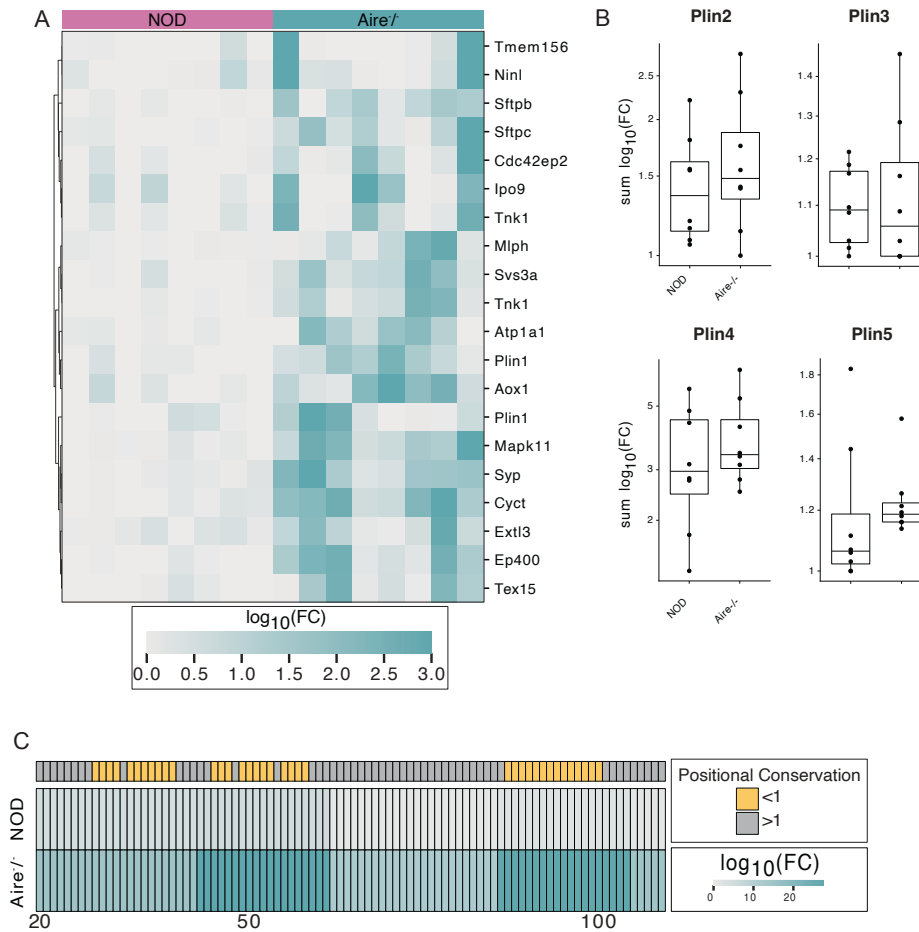

**Supplementary Figure 5. Autoreactive peptides in *Aire*<sup>-/-</sup> mice.** **A.** Heatmap of  $\log_{10}$  fold change over background in top 20 peptides ranked by fold change in *Aire*<sup>-/-</sup> versus NOD mice. **B.** Sum  $\log_{10}$  fold change over MBM of peptides tiling across Plin2, Plin3, Plin4, and Plin5. **C.** Heatmap of Plin1 PAT domain positional sum  $\log_{10}$  fold change over MBM in *Aire*<sup>-/-</sup> or NOD mice annotated with positional conservation with other perilipin family proteins. Peptide enrichments were identified by PhIP-seq and annotated by their corresponding protein.

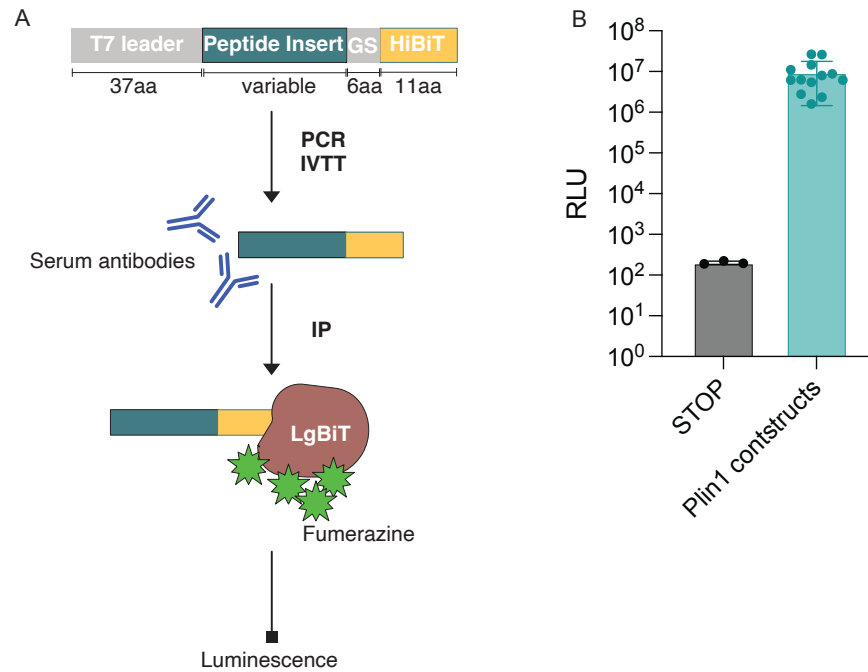

**Supplementary Figure 6. Method for split luciferase binding assay.** **A.** Schematic of split luciferase binding assay (SLBA) protocol. HiBiT-tagged constructs are synthesized as DNA oligomers, amplified by PCR, and *in vitro* translated (IVTT). After immunoprecipitation (IP) with serum antibodies, peptide enrichment is quantified by adding LgBiT that complexes with HiBiT tag and generates luminescence given a fumerazine substrate. **B.** Relative luminescence units (RLU) of in-frame stop codon or Plin1 constructs.

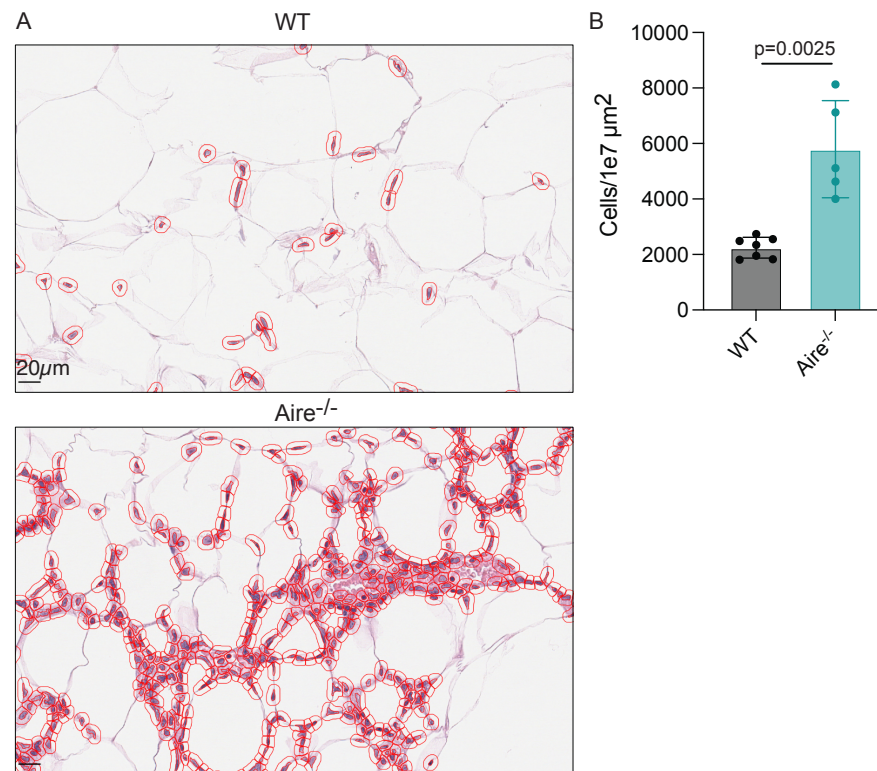

**Supplementary Figure 7. Quantification of cell-infiltrates in adipose tissue of *Aire*<sup>-/-</sup> mice. A.** Representative images of inguinal fat pads stained with H&E and infiltrating cell boundaries (red) identified by QuPath software in wildtype NOD or *Aire*<sup>-/-</sup> NOD mice. Scale bar corresponds to 20μm. **B.** Infiltrating cells per 1e7μm<sup>2</sup> area in wildtype NOD or *Aire*<sup>-/-</sup> NOD mice. KS test for significance.
